# Supplementary material
Source: PubMed Central journal article supplement (PMC5102132)
Supplement: EBM660398_Supplementary_Tables.pdf [file EBM660398_Supplementary_Tables.pdf]

Table 1. Components of the control and high-fat diet (HFD).

|                      | Control            |                       | HFD                |                       |
|----------------------|--------------------|-----------------------|--------------------|-----------------------|
|                      | g.kg <sup>-1</sup> | kcal.kg <sup>-1</sup> | g.kg <sup>-1</sup> | kcal.kg <sup>-1</sup> |
| Cornstarch (Q.S.P.)  | 397.5              | 1590                  | 115.5              | 462                   |
| Casein               | 200                | 800                   | 200                | 800                   |
| Sucrose              | 100                | 400                   | 100                | 400                   |
| Dextrinated starch   | 132                | 528                   | 132                | 528                   |
| Lard                 | -                  | -                     | 312                | 2808                  |
| Soybean Oil          | 70                 | 630                   | 40                 | 360                   |
| Cellulose            | 50                 | -                     | 50                 | -                     |
| Mineral Mix (AIN-93) | 35                 | -                     | 35                 | -                     |
| Vitamin Mix (AIN-93) | 10                 | -                     | 10                 | -                     |
| L-Cystine            | 3                  | -                     | 3                  | -                     |
| Choline              | 2.5                | -                     | 2.5                | -                     |
| Total                | 1000               | 3948                  | 1000               | 5358                  |

Table 2. Primers used in real-time polymerase chain reaction.

| Primer       | Sense                      | Antisense                   |
|--------------|----------------------------|-----------------------------|
| <i>Gapdh</i> | 5' ACCCAGAAGACTGTGGATGG 3' | 5' GGATGCAGGGATGATGTTCT 3'  |
| <i>Tnf</i>   | 5' TAGCCAGGAGGGAGACAGA 3'  | 5' TTTTCTGGAGGGAGATGTGG 3'  |
| <i>Nos2</i>  | 5' TGGTGGTGACAAGCACATTT 3' | 5' AAGGCCAAACACAGCATACC 3'  |
| <i>Mrc1</i>  | 5' ATTGCCCTGAACAGCAACTT 3' | 5' GACTTAAGCTTCGGCTCGTC 3'  |
| <i>Il-10</i> | 5' ATCGATTCTCCCCTGTGAA 3'  | 5' TTCATGGCCTTGTAGACACCT 3' |
